# Supplementary material
Source: publisher site journal article supplement (https://www.dovepress.com/article/431547)
Supplement: Supplementary file 1 [file get_supplementary_file.php]

**Supplementary material S1: Search strategy for the MEDLINE platform via OVID**

Searches were run from 2000- current. Additional papers were identified from personal library.

1 exp AGED/

2. elder*.mp.

3. older.mp.

4. geriatric*.mp.

5. aging.mp.

6. 1 or 2 or 3 or 4 or 5

7. APPETITE/

8. Appetite Regulation/

9. ANOREXIA/

10. unplanned weight loss.mp.

11. unintentional weight loss.mp.

12. appetite.mp.

13. anorexia.mp.

14. 7 or 8 or 9 or 10 or 11 or 12 or 13

15. 6 and 14

16. exp NEOPLASMS/

17. cancer*.mp.

18. neoplas*.mp.

19. malignan*.mp.

20. carcinoma*.mp.

21. 16 or 17 or 18 or 19 or 20

22. 15 not 21

23. Anorexia Nervosa/

24. anorexia nervosa.mp.

25. 23 or 24

26. 22 not 25

27. child*.mp.

28. 26 not 27

29. Animals/ not (Animals/ and Humans/)

30. 28 not 29
